# Supplementary material for: Genetic modification of dividing cells using episomally maintained S/MAR DNA vectors
Source: PubMed Central journal article supplement — Mol Ther Nucleic Acids. 2013 Aug 13;2(8):e115–. doi: 10.1038/mtna.2013.40 (PMC3759738; doi:10.1038/mtna.2013.40), 2013-08-13
Supplement: mtna201340x1.pdf [file mtna201340x1.pdf]

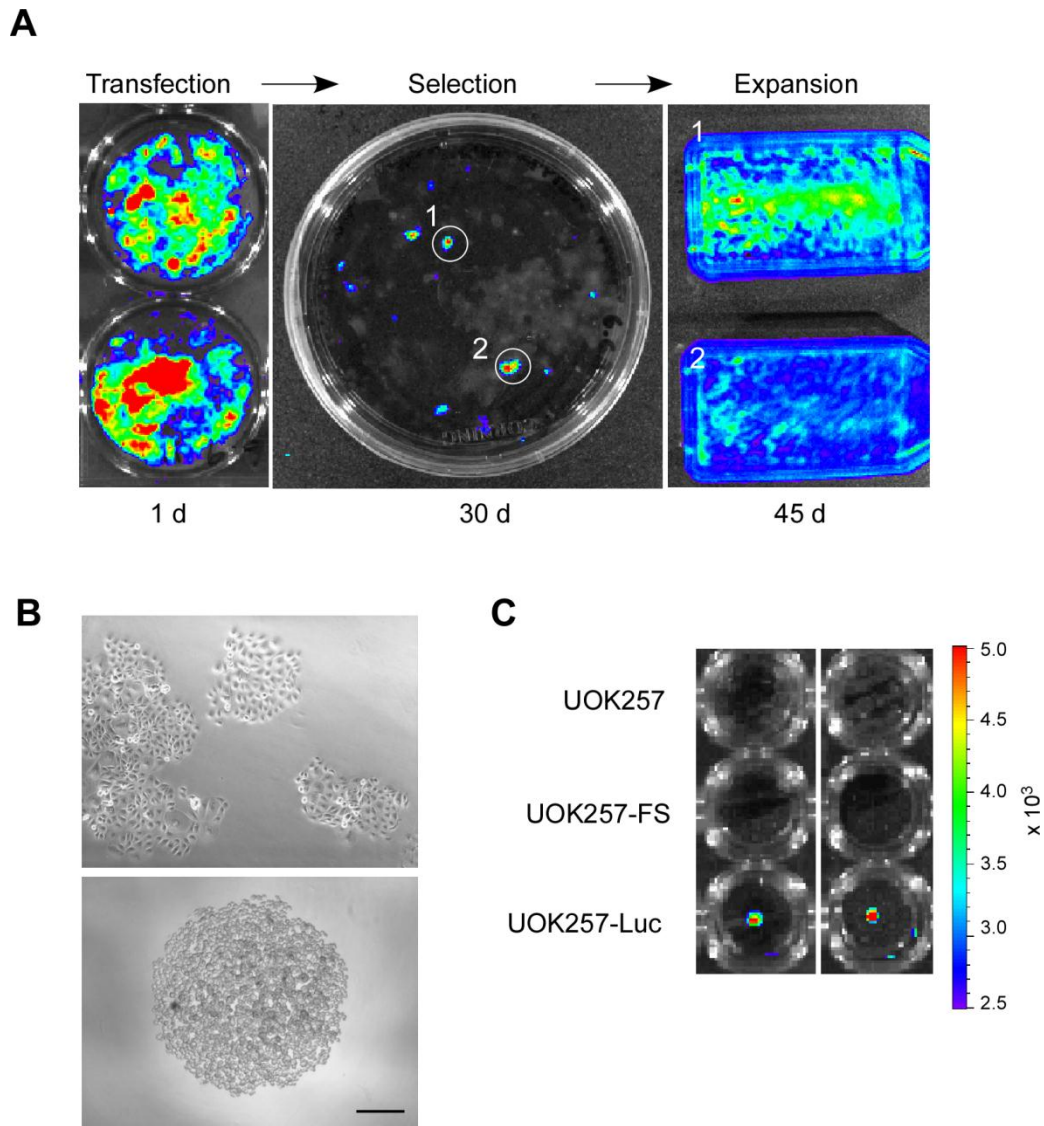

**Figure S1 Generation of UOK257-Luc cells using pUbC-Luc-SMAR.** A) UOK257 cells were transfected with pUbC-Luc-SMAR and placed under selection with G418 for four weeks. Two single colonies were isolated after this period and stable UOK257 cells expressing luciferase were obtained and expanded in normal medium. B) Morphology of UOK257-Luc cells on adherent plates (top) and in 3D culture (bottom), showing no morphological differences when compared to the parental UOK257 cells. Magnification 4x. Scale bar = 500 $\mu$ m. C) Confirmation of luciferase expression from UOK257-Luc in 3D culture, with UOK257-FS and UOK257 cells as controls. Bioluminescent imaging was

performed using the IVIS Spectrum bioimager (Living Image Software 2.5) and is represented as photons/sec/cm<sup>2</sup>/sr.

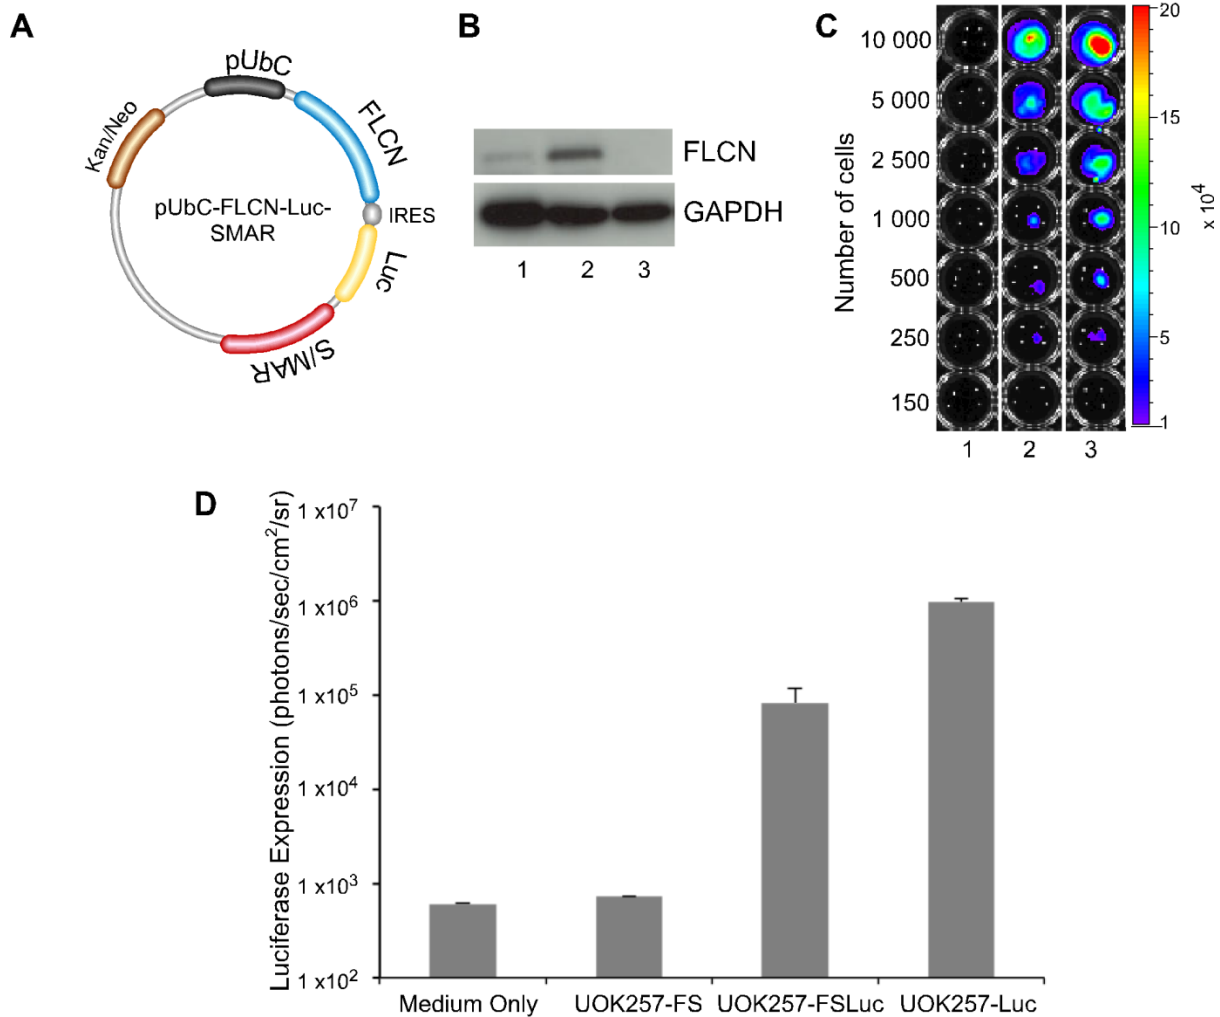

**Figure S2 Analysis of UOK257-FSLuc.** A) Schematic representation of pUbC-FLCN-Luc-SMAR used for the generation of UOK257-FSLuc. B) Compilation of Western blots showing FLCN expression from stably transfected UOK257-FSLuc (1), UOK257-FS (2) and FLCN-deficient UOK257 cells (3). GAPDH is shown as a loading control. C) Quantification of luciferase expression on increasing numbers of UOK257-FS (column 1), UOK257-FSLuc (column 2) and UOK257-Luc (column 3) cells, showing limits of signal luciferase detection between 250 and 150 cells. D) Quantification of luciferase
