# Supplementary material for: Genetic modification of dividing cells using episomally maintained S/MAR DNA vectors
Source: PubMed Central journal article supplement — Mol Ther Nucleic Acids. 2013 Aug 13;2(8):e115–. doi: 10.1038/mtna.2013.40 (PMC3759738; doi:10.1038/mtna.2013.40), 2013-08-13

performed using the IVIS Spectrum bioimager (Living Image Software 2.5) and is represented as photons/sec/cm<sup>2</sup>/sr.

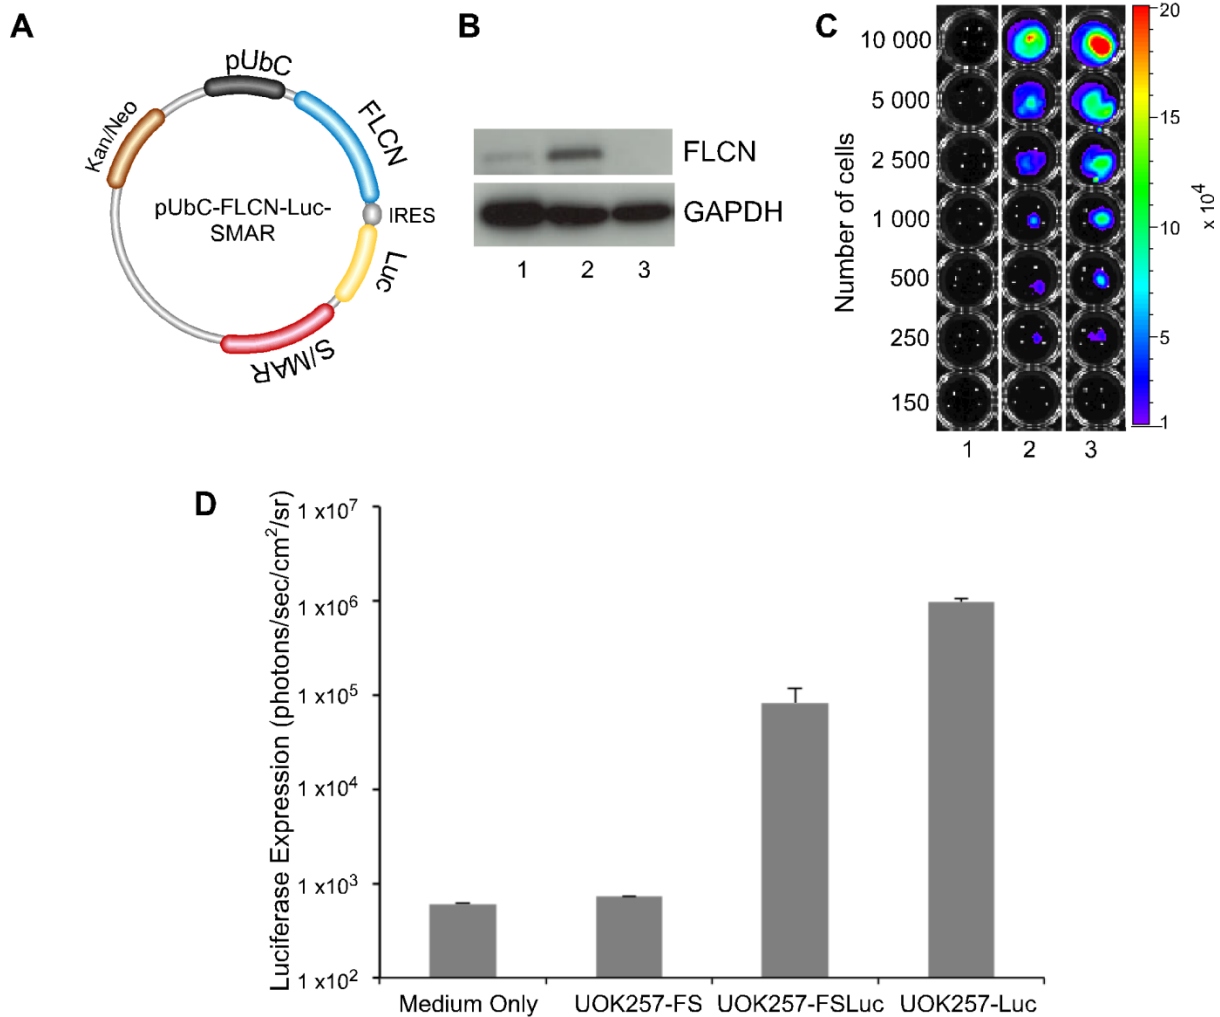

**Figure S2 Analysis of UOK257-FSLuc.** A) Schematic representation of pUbC-FLCN-Luc-SMAR used for the generation of UOK257-FSLuc. B) Compilation of Western blots showing FLCN expression from stably transfected UOK257-FSLuc (1), UOK257-FS (2) and FLCN-deficient UOK257 cells (3). GAPDH is shown as a loading control. C) Quantification of luciferase expression on increasing numbers of UOK257-FS (column 1), UOK257-FSLuc (column 2) and UOK257-Luc (column 3) cells, showing limits of signal luciferase detection between 250 and 150 cells. D) Quantification of luciferase

expression using the bioluminescent imager from equal cell numbers ( $1 \times 10^4$  cells) of UOK257-FS, UOK257-Luc and UOK257-FSLuc. Columns indicate mean  $\pm$  SD. Expression is represented as photons/sec/cm<sup>2</sup>/sr. The background level of luciferase expression on medium only is  $7 \times 10^2$  photons/sec/cm<sup>2</sup>/sr.

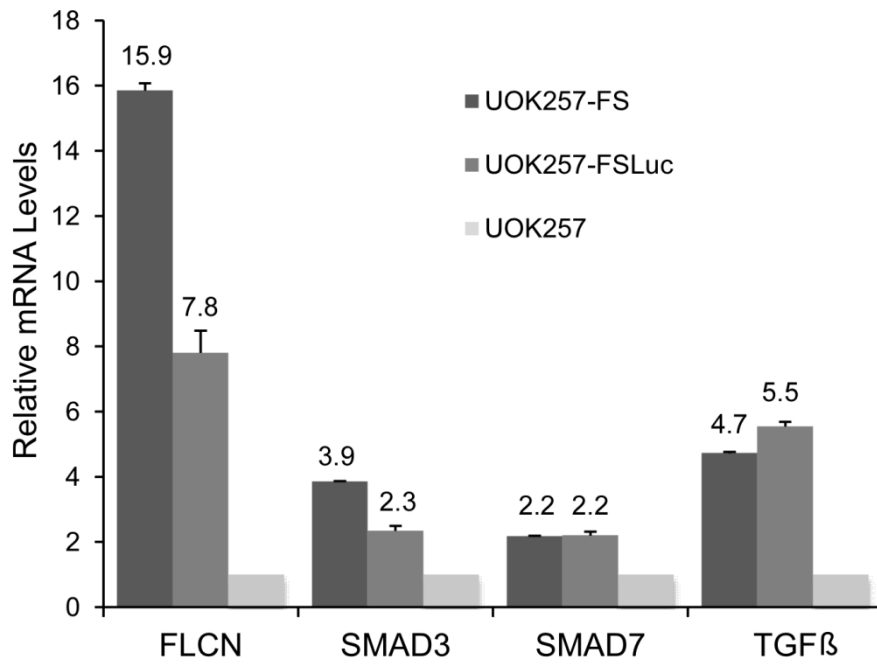

**Figure S3** Quantitative RT-PCR of FLCN, SMAD3, SMAD7 and TGFβ2 expression levels in UOK257-FSLuc, UOK257-FS and UOK257 cells. Column represents mean values (n=3).

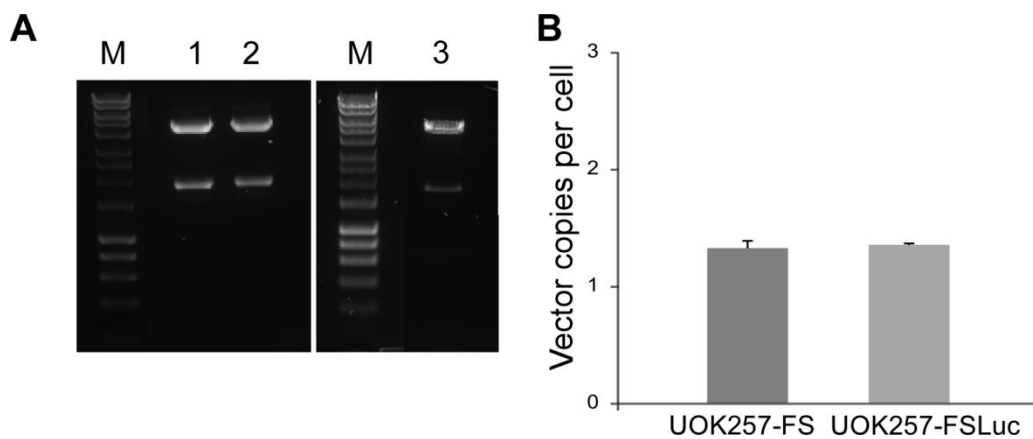

Supplement: mtna201340x2.pdf [file mtna201340x2.pdf]
