# Supplementary material for: Genetic modification of dividing cells using episomally maintained S/MAR DNA vectors
Source: PubMed Central journal article supplement — Mol Ther Nucleic Acids. 2013 Aug 13;2(8):e115–. doi: 10.1038/mtna.2013.40 (PMC3759738; doi:10.1038/mtna.2013.40), 2013-08-13
Supplement: mtna201340x4.pdf [file mtna201340x4.pdf]

expression using the bioluminescent imager from equal cell numbers ( $1 \times 10^4$  cells) of UOK257-FS, UOK257-Luc and UOK257-FSLuc. Columns indicate mean  $\pm$  SD. Expression is represented as photons/sec/cm<sup>2</sup>/sr. The background level of luciferase expression on medium only is  $7 \times 10^2$  photons/sec/cm<sup>2</sup>/sr.

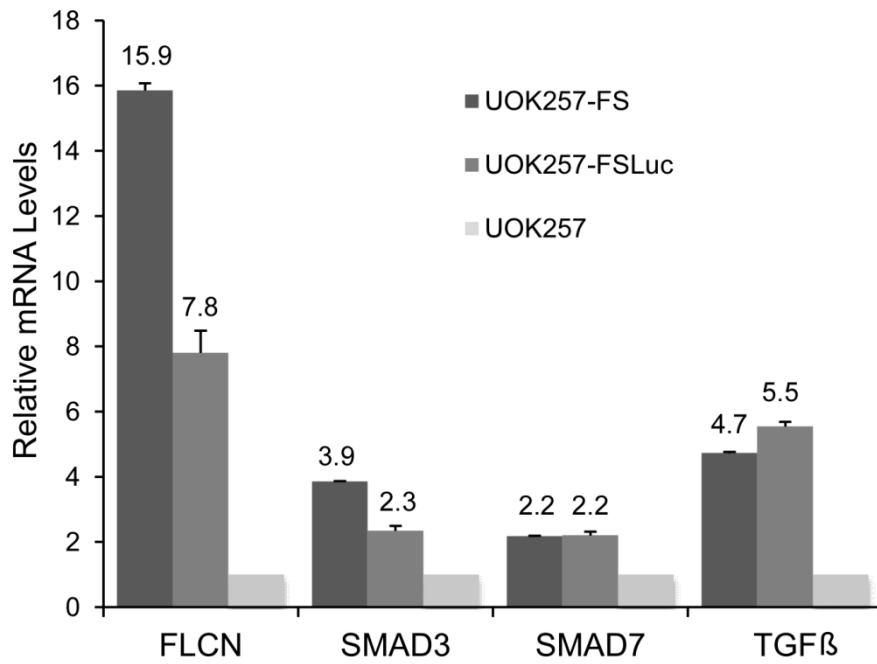

**Figure S3** Quantitative RT-PCR of FLCN, SMAD3, SMAD7 and TGFβ2 expression levels in UOK257-FSLuc, UOK257-FS and UOK257 cells. Column represents mean values (n=3).

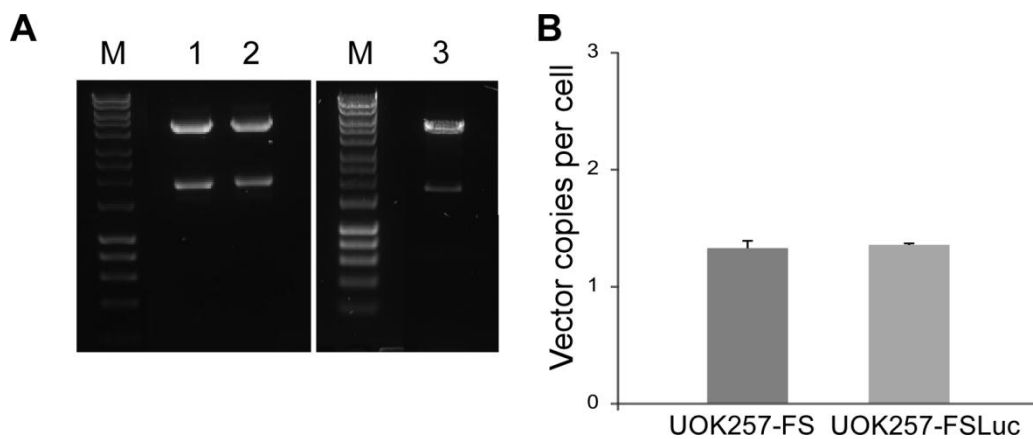

**Figure S4** A) Plasmid rescue of pUbC-Luc-SMAR from UOK257-Luc xenografts. DNA isolated from xenografts at day 72 post-injection was transformed into E.coli cells and the HpaI restriction patterns (lanes 1 and 2) of two selected colonies are shown. The HpaI restriction digest of the original transfected plasmid pUbC-Luc-SMAR is shown in lane 3. M: 1kb ladder (Hyperladder I, Bioline, UK). B) Quantitative PCR performed on DNA isolated from UOK257-FS and UOK257-FSLuc stable cells at day 30 post-transfection. The number vector genomes per diploid genome is shown, after normalisation with GAPDH gene, as described in materials and methods.
